# Supplementary material for: Effects of methylphenidate in children with attention deficit hyperactivity disorder: a near-infrared spectroscopy study with CANTAB®
Source: Springer Nature journal article supplement (doi:10.1186/s13034-014-0032-5), 2014-12-01
Supplement: MOESM6 [file 9776912]

**Table 1 Demographic data for children with treatment**

---

|                                                                | ADHD (N= 11) |
|----------------------------------------------------------------|--------------|
| Age M (SD)                                                     | 10.8 (1.8)   |
| Gender (M/F)                                                   | 10/1         |
| Full-Scale IQ Mean score (SD)                                  | 102.3 (17.3) |
| Verbal Comprehension Index: VCI Mean score (SD)                | 103.1 (13.6) |
| Perceptual Reasoning Index: PRI Mean score (SD)                | 103.4 (14.6) |
| Working Memory Index :WMI Mean score (SD)                      | 98.2 (23.3)  |
| Processing Speed Index :PSI Mean score (SD)                    | 98.6 (12.3)  |
| ADHD-RS-IV Total Score Mean score (SD)                         | 69.5 (25.4)  |
| ADHD-RS-IV Inattention Score Mean score (SD)                   | 69.6 (25.4)  |
| ADHD-RS-IV Hyperactivity and Impulsivity score Mean score (SD) | 65.4 (26.9)  |
| MPH dose, mg/kg Mean (Range)                                   | 33.6 (27-54) |
| Pubic financial assistance                                     | 0            |
| Parental separation                                            | 0            |

---
