# Supplementary material for: Effects of methylphenidate in children with attention deficit hyperactivity disorder: a near-infrared spectroscopy study with CANTAB®
Source: Springer Nature journal article supplement (doi:10.1186/s13034-014-0032-5), 2014-12-01
Supplement: MOESM8 [file 9776912]

**Table 3 Neuropsychological response to Methylhenidate**

|                                    | MPH off |      | MPH on |      | t value <sup>(a)</sup> | p    |
|------------------------------------|---------|------|--------|------|------------------------|------|
|                                    | Mean    | SD   | Mean   | SD   |                        |      |
| SWM(Between errors standard score) | -0.05   | 0.76 | 0.00   | 0.85 | 0.56                   | 0.82 |
| SWM(Strategy standard score)       | -0.35   | 0.77 | -0.23  | 0.72 | 1.3                    | 0.59 |
| SSP(standard score)                | -0.33   | 0.89 | -0.17  | 0.94 | 1.3                    | 0.34 |

Note; (a) pair t-test \* $p < .05$
